# Supplementary material for: Achieving efficient oxygen reduction on ultra-low metal-loaded electrocatalysts by constructing well-dispersed bimetallic sites and interconnected porous channels
Source: Royal Society of Chemistry journal article supplement (doi:10.1039/d2ta03744k), 2022-01-01
Supplement: d2ta03744k1.pdf [file d2ta03744k1.pdf]

## Supporting Information

### **Achieving Efficient Oxygen Reduction on Ultra-Low Metal-Loaded Electrocatalysts by Constructing Well-Dispersed Bimetallic Sites and Interconnected Porous Channels**

Chen Deng,<sup>ab‡</sup> Jingjin Tan,<sup>a‡</sup> Cui Ying Toe,<sup>c</sup> Xuan Li,<sup>d</sup> Guodong Li,<sup>b</sup> Xingxing Jiang,<sup>a</sup> Shaomin Wei,<sup>a</sup> Hengpan Yang,<sup>a</sup> Qi Hu<sup>a</sup> and Chuanxin He<sup>a\*</sup>

a. Department of Chemistry, College of Chemistry and Environmental Engineering, Shenzhen University, Shenzhen, Guangdong 518060, China.

E-mail: hecx@szu.edu.cn

b. Institute of Microscale Optoelectronics, Shenzhen University, Shenzhen, Guangdong 518060, China.

c. School of Engineering, the University of Newcastle, Callaghan, New South Wales 2308, Australia.

d. Department of Chemical Physics, University of Science and Technology of China, Hefei, Anhui, China

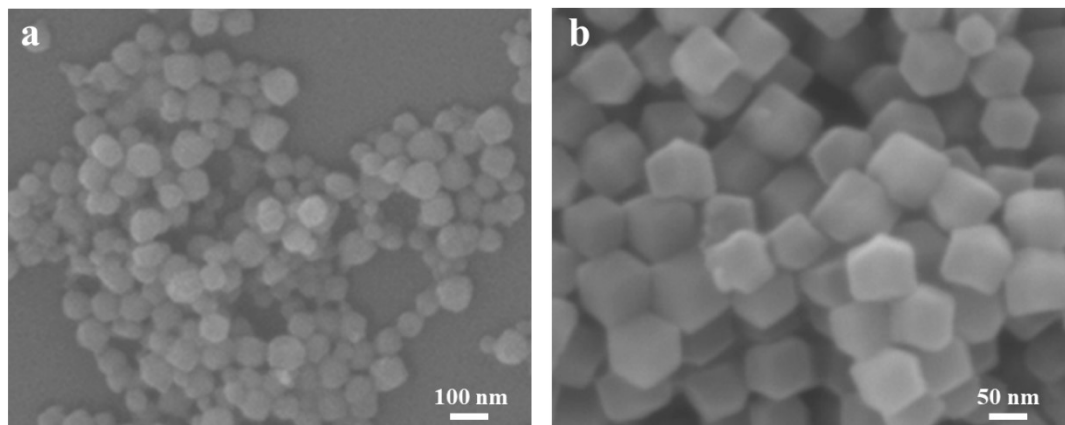

**Figure S1.** SEM images of ZIF-8 nanoparticles at different magnifications.

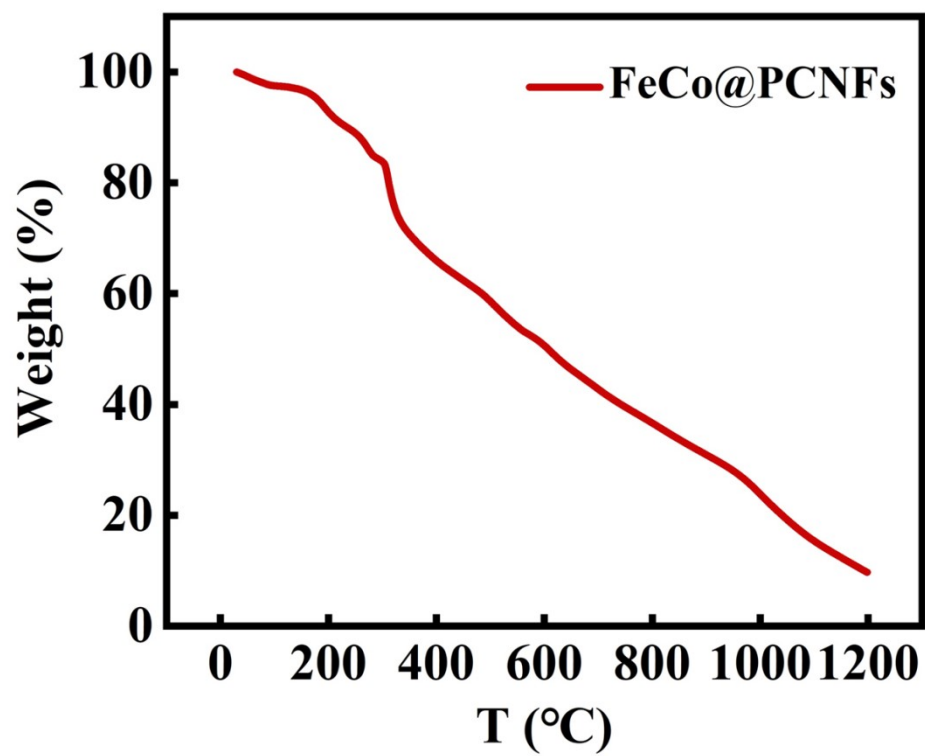

Figure S2. TGA curve of FeCo@PCNFs measured under N<sub>2</sub> atmosphere.

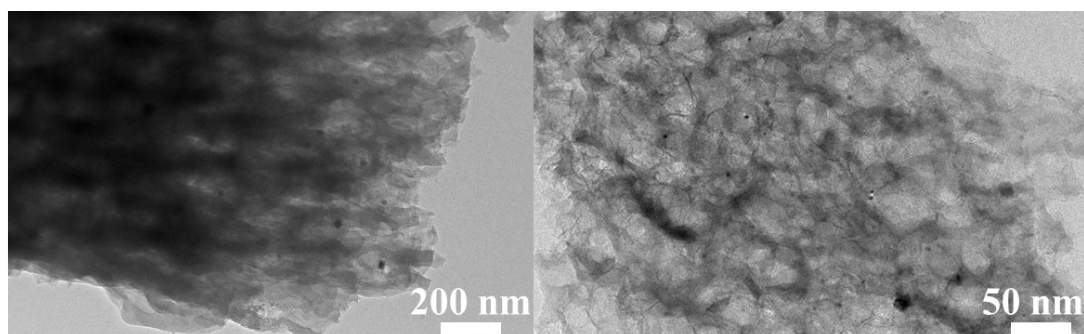

**Figure S3.** TEM images at high magnification of FeCo@PCNFs.

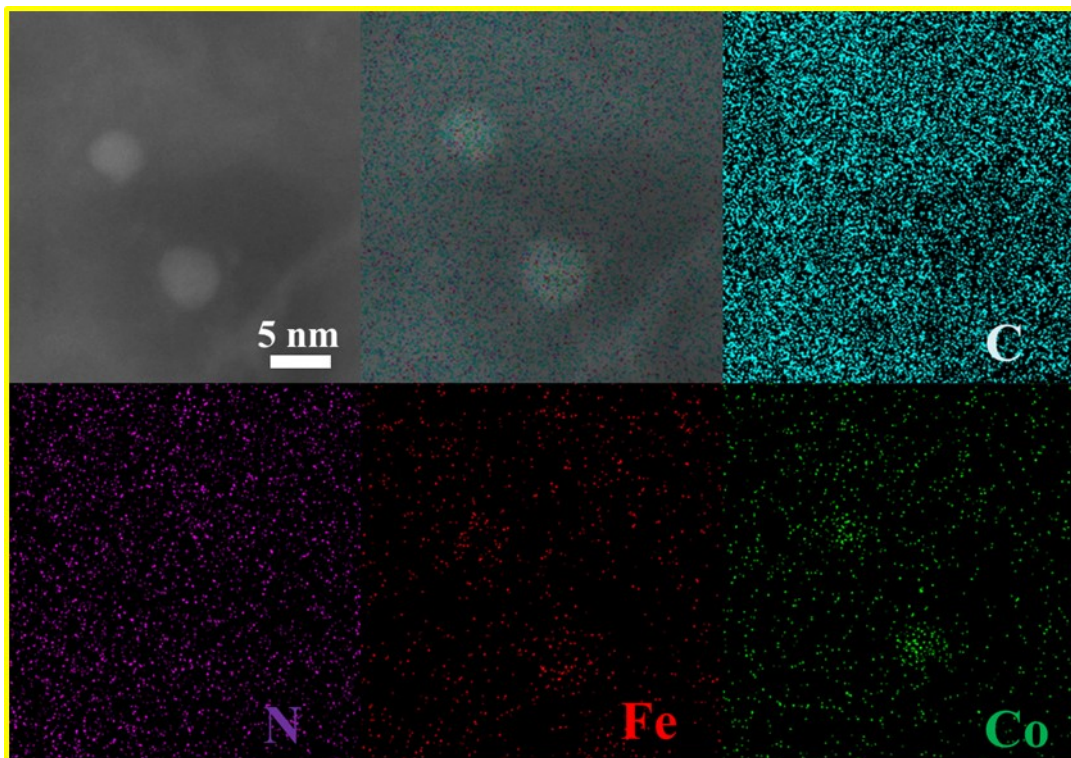

**Figure S4.** HADF-STEM-EDX mapping at high magnification of FeCo@PCNFs.

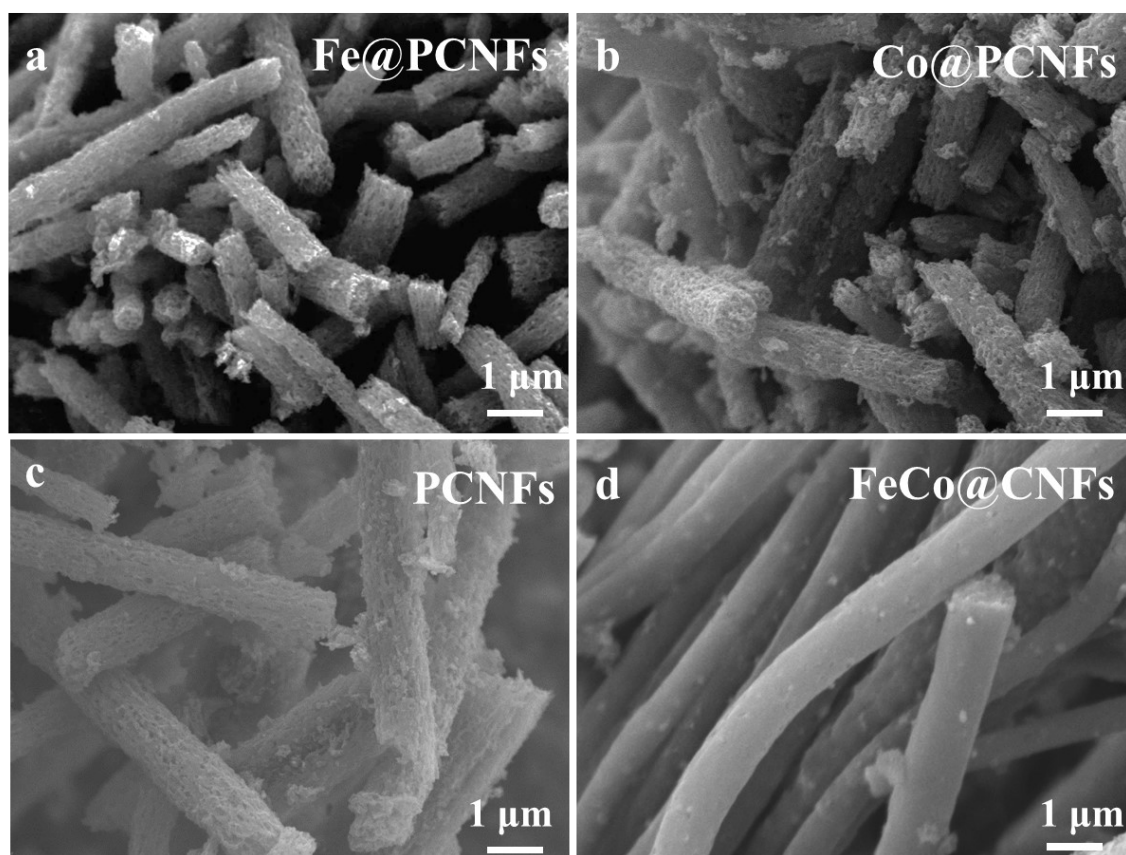

**Figure S5** SEM images of all samples: (a) Fe@PCNFs, (b) Co@PCNFs, (c) PCNFs, and (d) FeCo@CNFs.

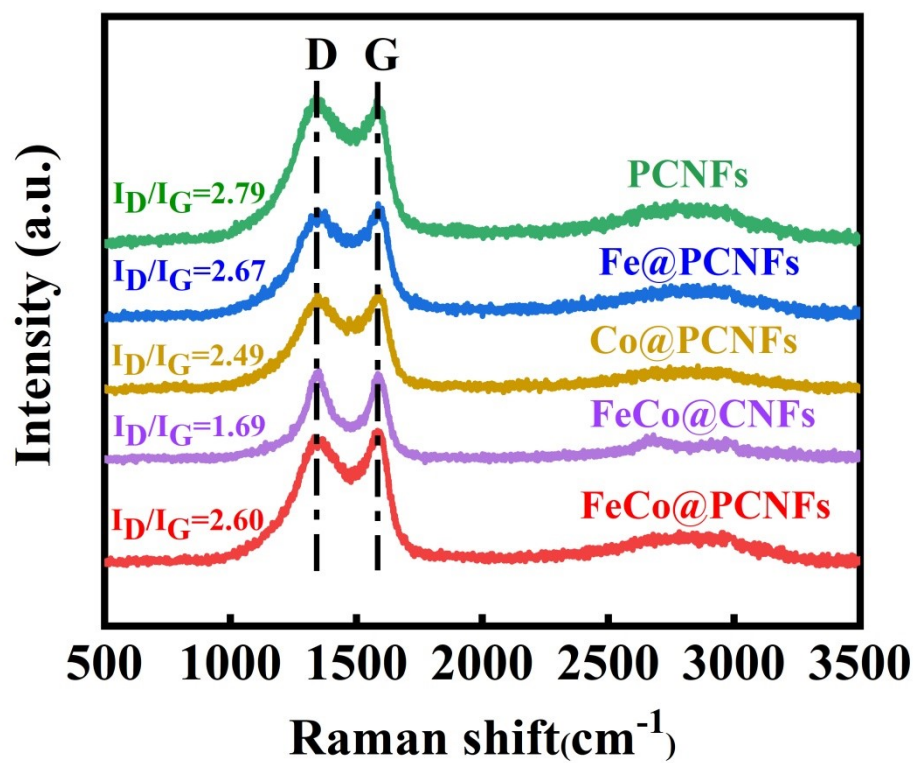

**Figure S6.** Raman spectra of all samples.  $I_D/I_G$  ratios is evaluated by the integral area values of D and G peaks.

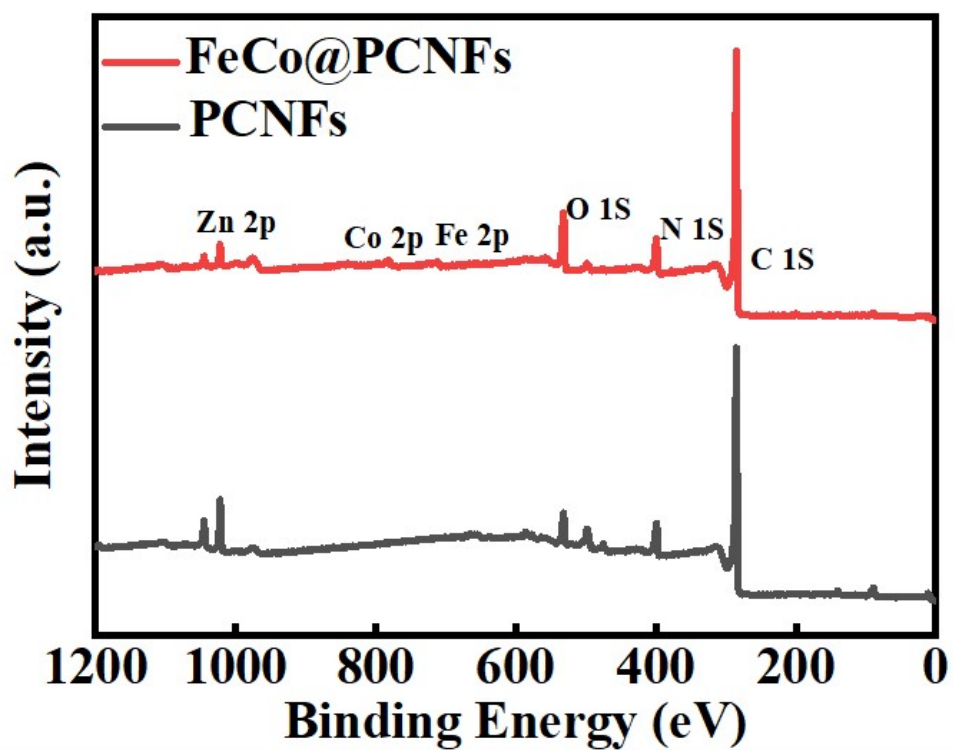

Figure S7. XPS survey spectra of FeCo@PCNFs and PCNFs.



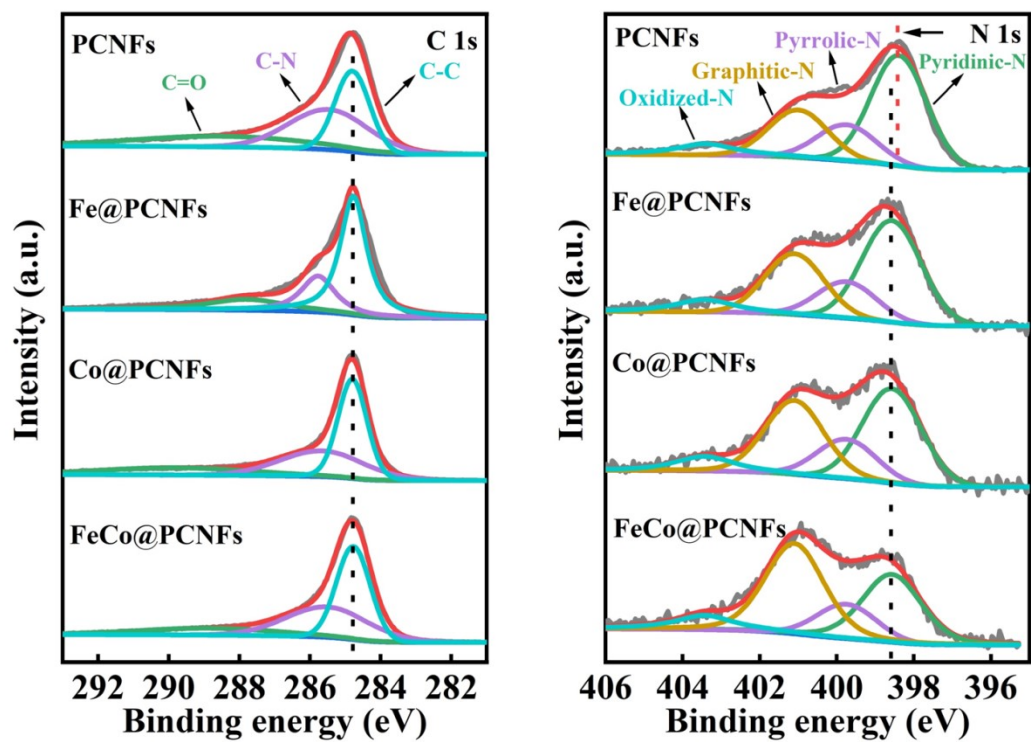

**Figure S8.** High-resolution XPS spectra of C 1s and N 1s for Fe@PCNFs, Co@PCNFs, FeCo@PCNFs and PCNFs.

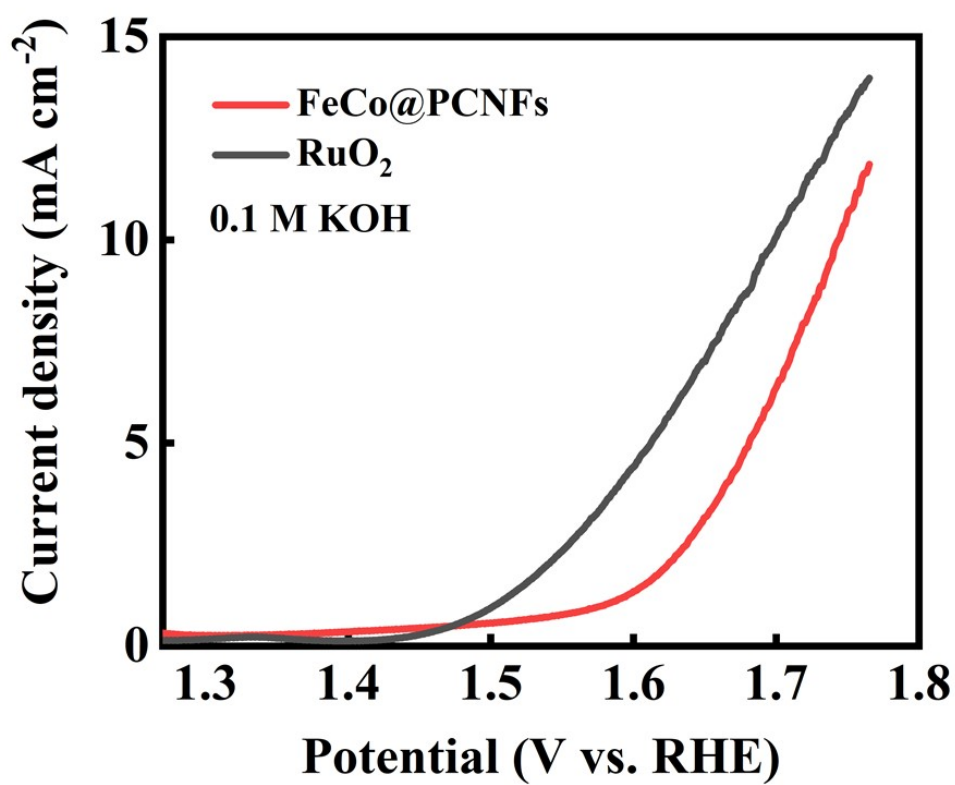

**Figure S9.** LSV curve of FeCo@PCNFs for the OER in 0.1M KOH solution.

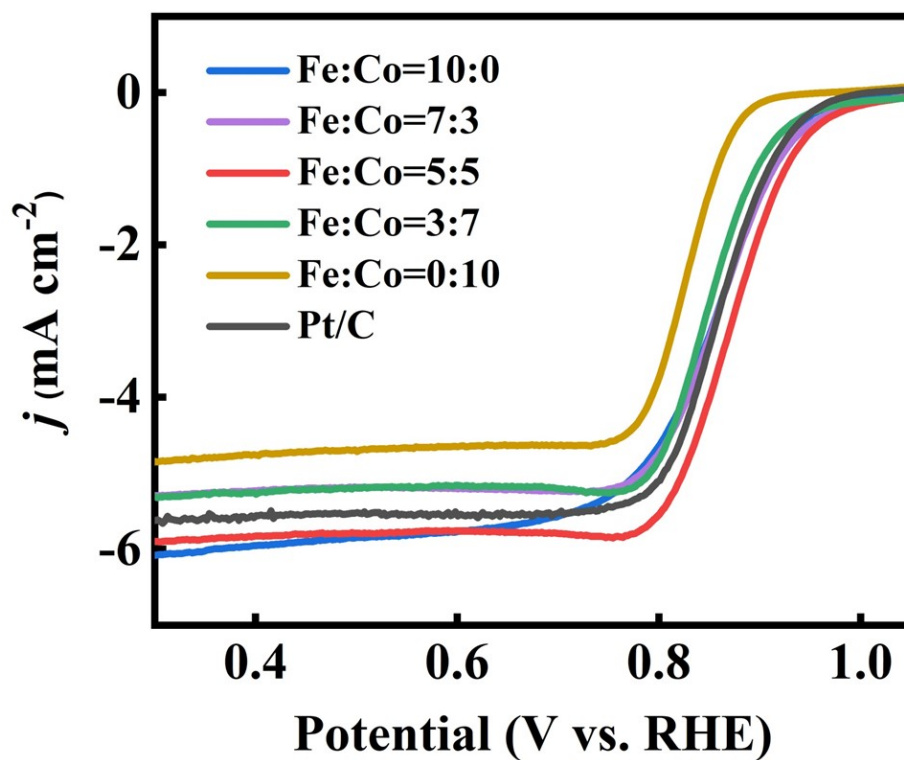

**Figure S10.** LSV comparison of between FeCo@PCNFs and control samples with different Fe/Co ratios in O<sub>2</sub>-saturated 0.1M KOH solution at a sweep rate of 5 mV<sup>-1</sup> and electrode rotation speed of 1600 rpm.

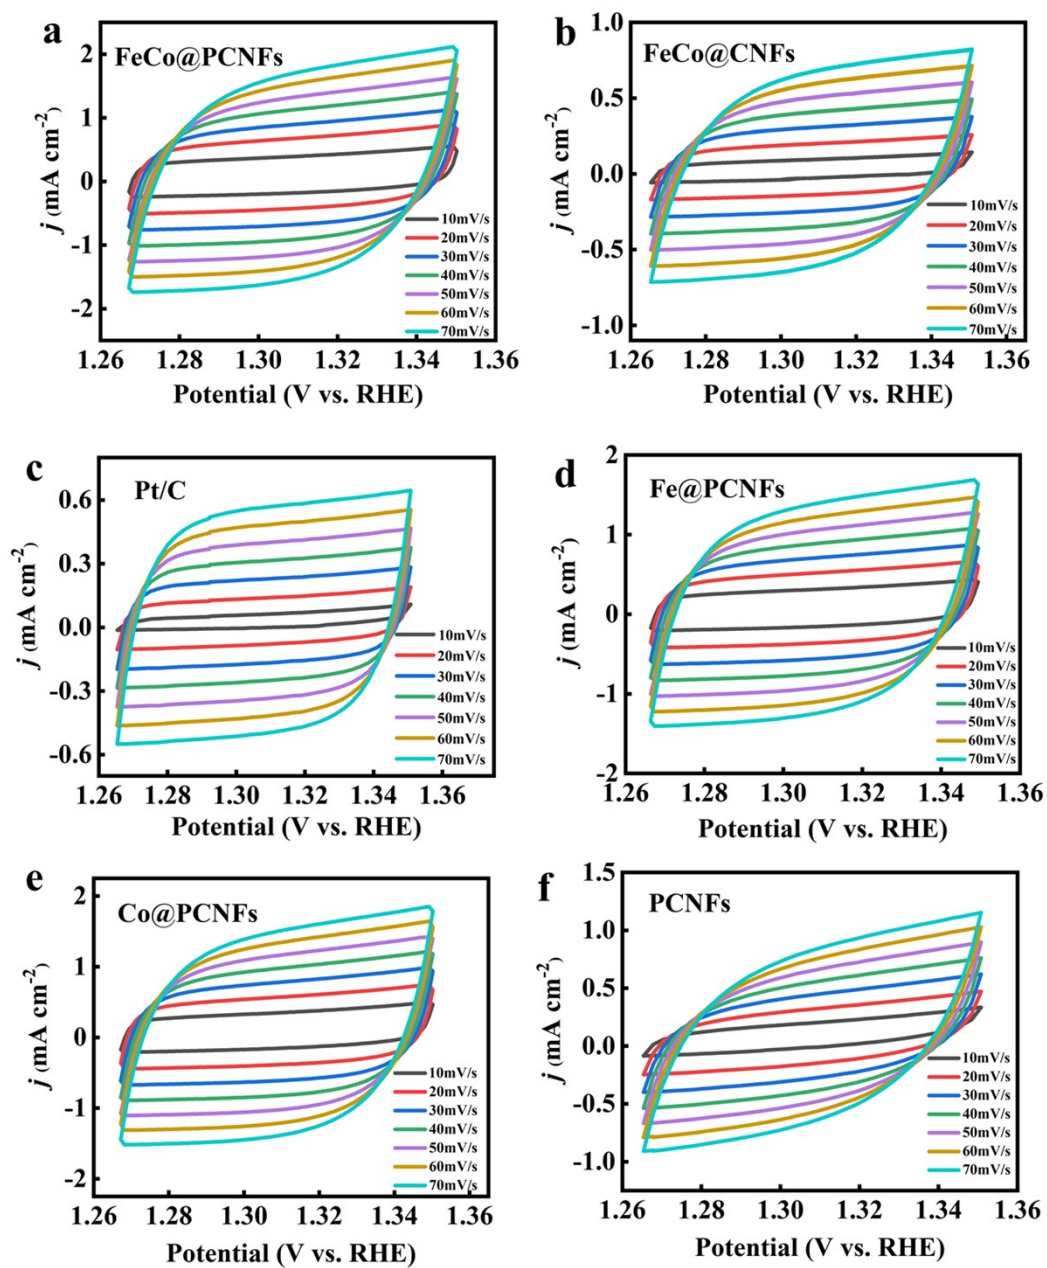

**Figure S11.** CV curves within a potential window from 1.267 to 1.350 V vs. RHE without Faradaic processes at various scan rates of 10, 20, 30, 40, 50, 60, and 70  $\text{mV s}^{-1}$ . (a) Fe@PCNFs; (b) Co@PCNFs; (c) FeCo@PCNFs; (d) Pt/C; (e) Fe@PCNFs; (f) FeCo@PCNFs.

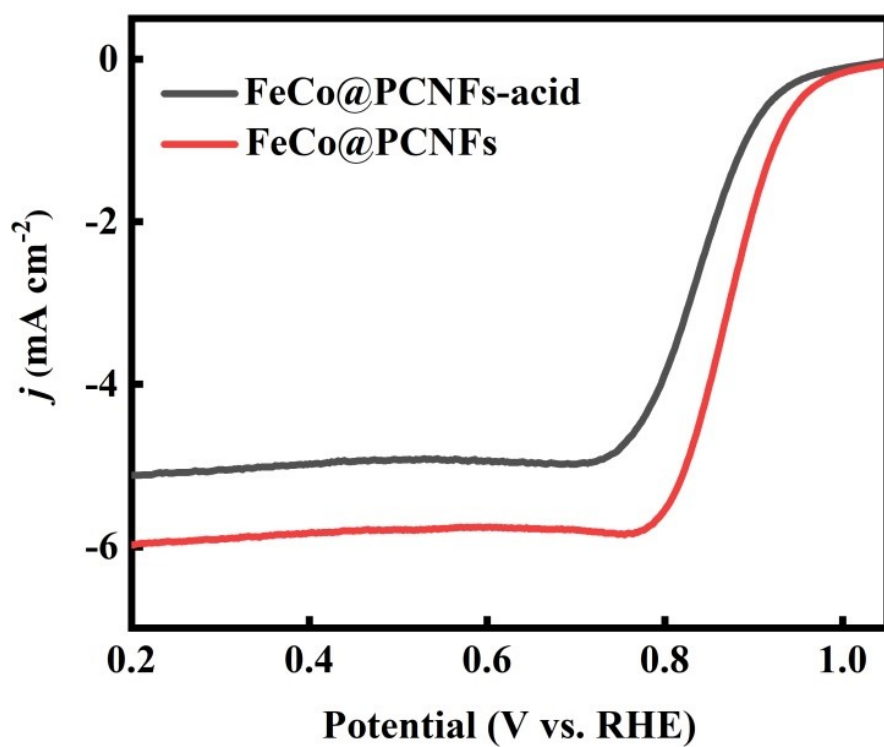

**Figure S12.** LSV comparison of FeCo@PCNFs and FeCo@PCNFs-acid in O<sub>2</sub>-saturated 0.1M KOH solution at a sweep rate of 5 mV<sup>-1</sup> and electrode rotation speed of 1600 rpm.

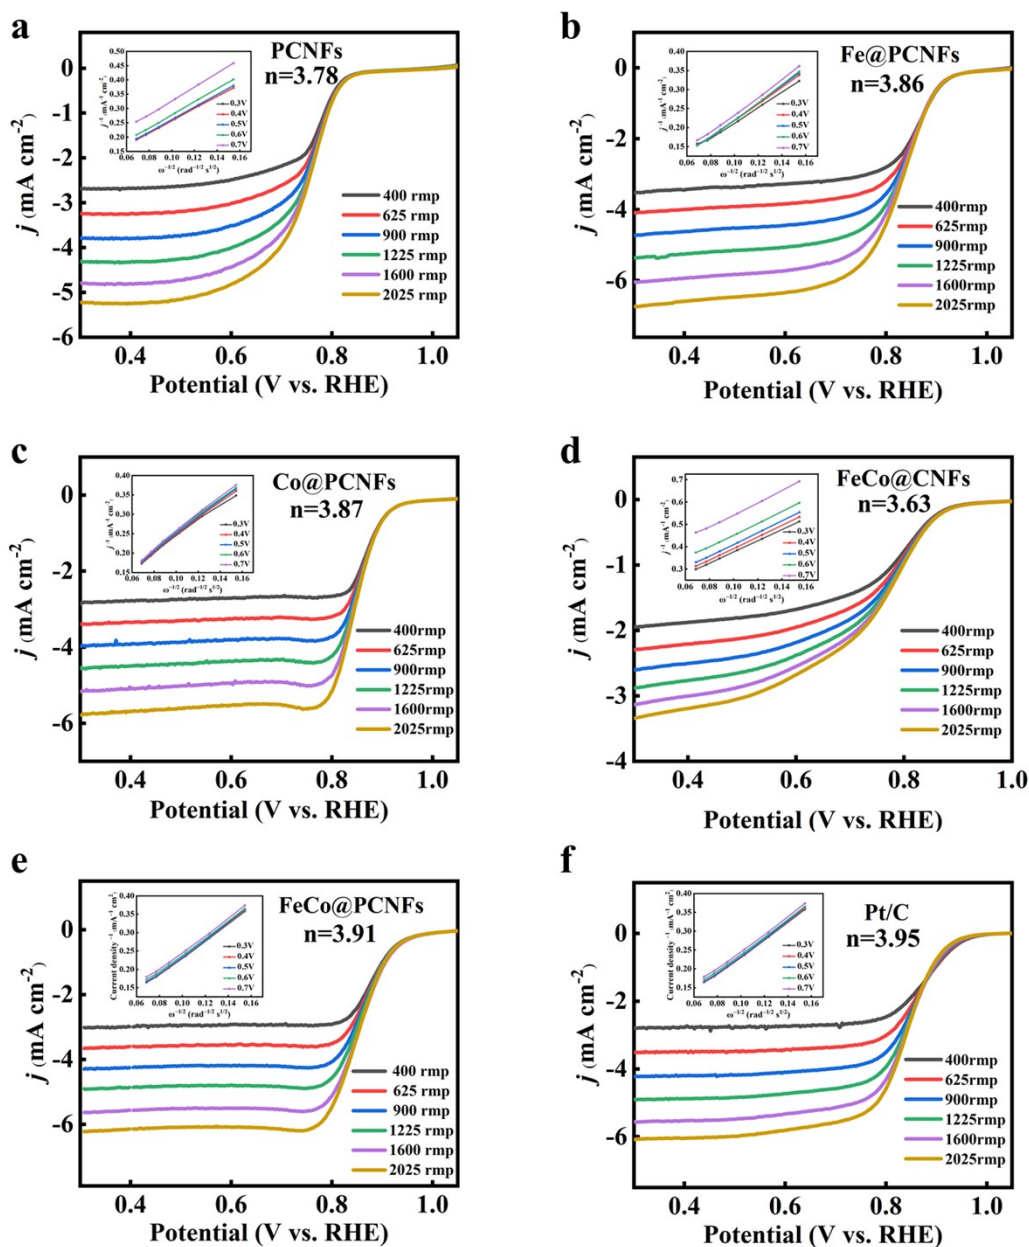

**Figure S13.** RDE polarization curves of different electrocatalysts at different rotating speeds, and the inset shows corresponding K–L plots at different potentials and electron transfer number.

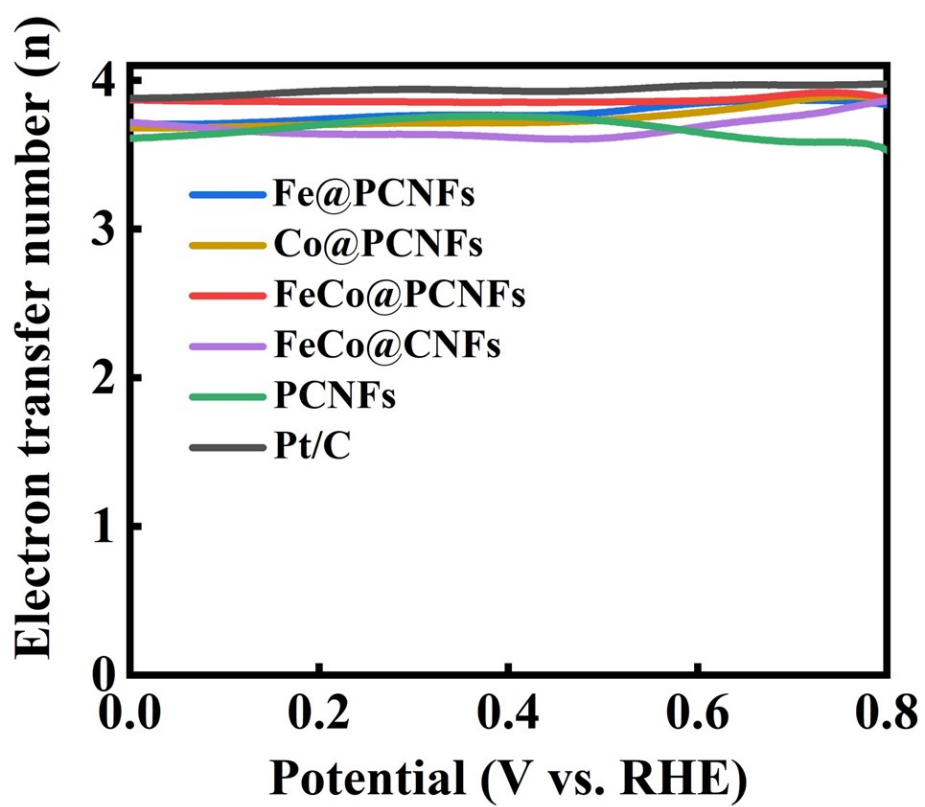

Figure S14. Electron transfer number of all samples calculated from RRDE data.

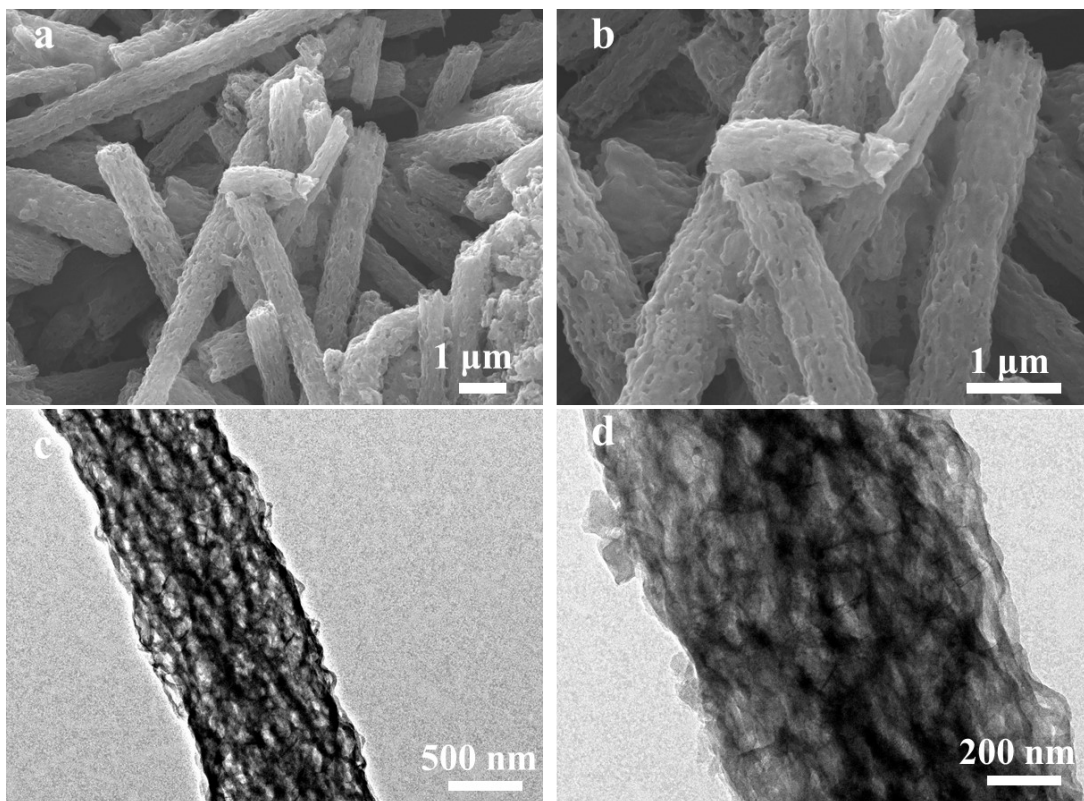

**Figure S15.** SEM and HRTEM images of FeCo@PCNFs after 32 h chronoamperometric curve.



**Table S1.** BET surface area, pore volumes and EDLC values for all samples.

| <b>Samples</b>    | <b>BET surface area (m<sup>2</sup> g<sup>-1</sup>)</b> | <b>BJH Adsorption average pore diameter (nm)</b> | <b>BJH Adsorption cumulative volume of pore(cm<sup>3</sup> g<sup>-1</sup>)</b> | <b>EDLC (mF cm<sup>-2</sup>)</b> |
|-------------------|--------------------------------------------------------|--------------------------------------------------|--------------------------------------------------------------------------------|----------------------------------|
| <b>FeCo@PCNFs</b> | 481.76                                                 | 22.19                                            | 0.69                                                                           | 22.3                             |
| <b>FeCo@CNFs</b>  | 302.70                                                 | 5.24                                             | 0.22                                                                           | 9.7                              |
| <b>Fe@PCNFs</b>   | 444.29                                                 | 17.79                                            | 0.39                                                                           | 18.1                             |
| <b>Co@PCNFs</b>   | 438.68                                                 | 19.02                                            | 0.64                                                                           | 19.8                             |
| <b>PCNFs</b>      | 220.03                                                 | 21.7                                             | 0.61                                                                           | 6.4                              |
| <b>Pt/C</b>       | /                                                      | /                                                | /                                                                              | 8.4                              |

**Table S2.** The integral areas values of D and G peaks of obtained samples measured from Raman results.

| <b>Samples</b>    | <b>A<sub>D</sub></b> | <b>A<sub>G</sub></b> | <b>I<sub>D</sub>/I<sub>G</sub></b> |
|-------------------|----------------------|----------------------|------------------------------------|
| <b>PCNFs</b>      | 276480.41            | 99216.38             | 2.79                               |
| <b>Fe@PCNFs</b>   | 277058.74            | 103514.30            | 2.68                               |
| <b>Co@PCNFs</b>   | 201095.72            | 80440.48             | 2.49                               |
| <b>FeCo@CNFs</b>  | 268580.58            | 159080.68            | 1.69                               |
| <b>FeCo@PCNFs</b> | 194345.52            | 74617.56             | 2.60                               |

**Table S3.** ICP-OES results of Fe and Co elements in different catalysts.

| <b>Samples</b>    | <b>Fe</b> | <b>Co</b> |
|-------------------|-----------|-----------|
| <b>FeCo@PCNFs</b> | 0.84%     | 0.83%     |
| <b>FeCo@CNFs</b>  | 2.21%     | 2.58%     |
| <b>Fe@PCNFs</b>   | 1.58%     | /         |
| <b>Co@PCNFs</b>   | /         | 1.93%     |

**Table S4.** Surface atomic content of all samples obtained from XPS.

| <b>Samples</b>    | <b>(Atomic ratio %)</b> |          |          |           |           |
|-------------------|-------------------------|----------|----------|-----------|-----------|
|                   | <b>C</b>                | <b>N</b> | <b>O</b> | <b>Fe</b> | <b>Co</b> |
| <b>FeCo@PCNFs</b> | 88.61                   | 3.65     | 6.75     | 0.53      | 0.46      |
| <b>Fe@PCNFs</b>   | 82.38                   | 7.99     | 8.76     | 0.88      | /         |
| <b>Co@PCNFs</b>   | 84.1                    | 7.99     | 6.9      | /         | 1.01      |
| <b>PCNFs</b>      | 81.74                   | 11.4     | 6.86     | /         | /         |

**Table S5.** Information of N content for different samples from XPS results.

| <b>Samples</b>    | <b>Relative peak area percentage (%)</b> |                   |                    |                    |
|-------------------|------------------------------------------|-------------------|--------------------|--------------------|
|                   | <b>Pyridinic-N</b>                       | <b>Pyrrolic-N</b> | <b>Graphitic-N</b> | <b>Oxidized -N</b> |
| <b>FeCo@PCNFs</b> | 21.53                                    | 24.79             | 48.77              | 4.91               |
| <b>Fe@PCNFs</b>   | 40.68                                    | 24.40             | 18.89              | 16.03              |
| <b>Co@PCNFs</b>   | 31.16                                    | 22.28             | 30.04              | 16.52              |
| <b>PCNFs</b>      | 42.98                                    | 22.81             | 21.05              | 13.16              |

**Table S6.** Comparison of ORR performance between FeCo@PCNFs and other reported Fe-, Co-based electrocatalysts under O<sub>2</sub>-saturated 0.1 M KOH.

| Catalyst                                 | Loading<br>(mg cm <sup>-2</sup> ) | $E_{\text{onset}}$<br>(V <sub>RHE</sub> ) | $E_{1/2}$<br>(V <sub>RHE</sub> ) | Reference                                                  |
|------------------------------------------|-----------------------------------|-------------------------------------------|----------------------------------|------------------------------------------------------------|
| NiCoP/CNF900                             | 0.5                               | /                                         | 0.82                             | <i>Adv. Energy. Mater.</i><br><b>2018</b> , 8, 1800555     |
| Co@CNF-700                               | 0.285                             | 0.923                                     | 0.796                            | <i>J. Power Sources</i><br><b>2018</b> , 380, 174          |
| FeCo-NCNFs-800                           | 0.255                             | 0.907                                     | 0.817                            | <i>ACS Sustainable Chem. Eng.</i><br><b>2019</b> , 7, 5462 |
| FeCo/Co <sub>2</sub> P@NPCF              | 0.28                              | 0.85                                      | 0.79                             | <i>Adv. Energy. Mater.</i><br><b>2020</b> , 10, 1903854    |
| Fe <sub>3</sub> C@MHNFS                  | 0.2                               | /                                         | 0.90                             | <i>J. Mater. Chem. A</i><br><b>2020</b> , 8, 18125         |
| FeCo-NC                                  | 0.1                               | 0.981                                     | 0.848                            | <i>Chem. Eng. J.</i><br><b>2020</b> , 395, 125158          |
| CoFe@HNSs                                | 0.24                              | 0.998                                     | 0.897                            | <i>Chem. Commun.</i><br><b>2021</b> , 57, 2049             |
| FeCo/Se-CNT                              | /                                 | 0.97                                      | 0.9                              | <i>Nano Lett.</i><br><b>2021</b> , 21, 2255                |
| Fe <sub>1</sub> Co <sub>1</sub> -CNF     | 0.2                               | 0.99                                      | 0.87                             | <i>Nano Energy</i><br><b>2021</b> , 87, 106147             |
| FeCo-N-HCN                               | 0.1                               | 0.98                                      | 0.86                             | <i>Adv. Funct. Mater.</i><br><b>2021</b> , 31, 2011289     |
| NPC/FeCo@NCNT                            | 0.2                               | 0.92                                      | 0.835                            | <i>Adv. Sci.</i><br><b>2021</b> , 8, 2004572               |
| Pd/FeCo                                  | 0.42                              | 0.98                                      | 0.85                             | <i>Adv. Energy Mater.</i><br><b>2021</b> , 11, 2002204     |
| Fe <sub>1</sub> Co <sub>3</sub> -NC-1100 | 0.736                             | 1.05                                      | 0.877                            | <i>ACS Catal.</i><br><b>2022</b> , 12, 1216                |
| FeCo@PCNFs                               | 0.5                               | 0.97                                      | 0.875                            | <b>This work</b>                                           |

**Table S7.** Summary of ORR performance for all samples in. Rotating disk electrode (RDE) results in terms of onset potential ( $E_{\text{onset}}$ ) at  $0.3 \text{ mA cm}^{-2}$ , limiting current density ( $J_{\text{L}}$ ), half-wave potential ( $E_{1/2}$ ), kinetic current density ( $J_{\text{k}}$ ) at  $0.82 \text{ V}$  and electron transfer number  $n$  under  $\text{O}_2$ -saturated  $0.1 \text{ M KOH}$ .

| Catalyst          | $E_{\text{onset}}$<br>( $\text{V}_{\text{RHE}}$ ) | $E_{1/2}$<br>( $\text{V}_{\text{RHE}}$ ) | $J_{\text{L}}$<br>( $\text{mA cm}^{-2}$ ) | $J_{\text{k}}$ at $0.82$<br>$\text{V}$ ( $\text{mA cm}^{-2}$ ) | Tafel slopes<br>( $\text{mA dec}^{-1}$ ) | $n$  |
|-------------------|---------------------------------------------------|------------------------------------------|-------------------------------------------|----------------------------------------------------------------|------------------------------------------|------|
| <b>Pt/C</b>       | 0.94                                              | 0.86                                     | 5.6                                       | 26.6                                                           | 111.7                                    | 3.92 |
| <b>FeCo@PCNFs</b> | 0.97                                              | 0.88                                     | 5.8                                       | 39.7                                                           | 89.6                                     | 3.88 |
| <b>FeCo@CNFs</b>  | 0.87                                              | 0.80                                     | 2.5                                       | 1.2                                                            | 206.9                                    | 3.72 |
| <b>Fe@PCNFs</b>   | 0.95                                              | 0.86                                     | 5.7                                       | 15.3                                                           | 90.6                                     | 3.86 |
| <b>Co@PCNFs</b>   | 0.88                                              | 0.83                                     | 4.7                                       | 7.0                                                            | 111.1                                    | 3.82 |
| <b>PCNFs</b>      | 0.81                                              | 0.73                                     | 3.7                                       | 0.2                                                            | 135.6                                    | 3.61 |

**Table S8.** Compared with recently reported Fe-, Co-based electrocatalysts regarding the performance of Zn-Air batteries.

| Catalyst                           | Loading (mg cm <sup>-2</sup> ) | Open circuit potential (V) | Peak power density (mW cm <sup>-2</sup> ) | Specific capacity (mAh g <sub>Zn</sub> <sup>-1</sup> ) | Reference                                              |
|------------------------------------|--------------------------------|----------------------------|-------------------------------------------|--------------------------------------------------------|--------------------------------------------------------|
| Co/Co-N-C                          | /                              | 1.41                       | 132                                       | /                                                      | <i>Adv. Mater.</i><br><b>2019</b> , 31, 1901666        |
| VC-MOF-Fe                          | 1                              | 1.49                       | 113                                       | /                                                      | <i>Nano Energy</i><br><b>2020</b> , 82, 105714         |
| Co-NC-800                          | 1                              | 1.44                       | 109.5                                     | 657.2<br>at 20mA <sup>-2</sup>                         | <i>Chem. Eng. J.</i><br><b>2020</b> , 409, 128171      |
| Co@hNCTs-800                       | 2                              | 1.45                       | 149                                       | 746<br>at 10mA <sup>-2</sup>                           | <i>Nano Energy</i><br><b>2020</b> , 71, 104592         |
| Co/CNWs/CNFs                       | /                              | 1.46                       | 304                                       | 762<br>at 10mA <sup>-2</sup>                           | <i>Adv. Funct. Mater.</i><br><b>2021</b> , 31, 2105021 |
| A-Fe-NC                            | 2                              | 1.45                       | 132.2                                     | /                                                      | <i>Chem. Eng. J.</i><br><b>2021</b> , 426, 127345      |
| Fe-doped MOF<br>CoV@CoO            | 1                              | 1.45                       | 138                                       | /                                                      | <i>Nano Energy</i><br><b>2021</b> , 88, 106238         |
| 0.05CoO <sub>3</sub> @PNC          | 2                              | 1.49                       | 157.1                                     | 887<br>at 10mA <sup>-2</sup>                           | <i>Nano Energy</i><br><b>2021</b> , 83, 105813         |
| Co <sub>2</sub> Cu <sub>1</sub> -S | 1                              | /                          | 195                                       | 815.3<br>at 5mA <sup>-2</sup>                          | <i>J. Mater. Chem. A</i><br><b>2021</b> , 9, 18329     |
| Fe/SNCFs-NH <sub>3</sub>           | 0.5                            | /                          | 255.84                                    | /                                                      | <i>Adv. Mater.</i><br><b>2021</b> , 34, 2105410        |
| Co-N-CCNFMs/CC                     | 1                              | 1.497                      | 90.3                                      | /                                                      | <i>Energy Storage Mater.</i><br><b>2022</b> , 47, 365  |
| SA&NP-FeCo-NTS                     | 1.2                            | 1.48                       | 102.2                                     | 770.8<br>at 10mA <sup>-2</sup>                         | <i>Adv. Funct. Mater.</i><br><b>2022</b> , 32, 2112805 |
| Co@Fe-Nx/C                         | 2                              | 1.44                       | 249                                       | 802<br>at 10mA <sup>-2</sup>                           | <i>Chem. Eng. J.</i><br><b>2022</b> , 436, 135191      |
| FeCo@PCNFs                         | 2                              | 1.48                       | 289.5                                     | 764.5<br>at 10mA <sup>-2</sup>                         | <b>This work</b>                                       |
